# Supplementary material for: Structural insights into DNA cleavage activation of CRISPR-Cas9 system
Source: PubMed Central journal article supplement (PMC5680257; doi:10.1038/s41467-017-01496-2), 2017-11-09
Supplement: 41467_2017_1496_MOESM1_ESM.pdf [file 41467_2017_1496_MOESM1_ESM.pdf]

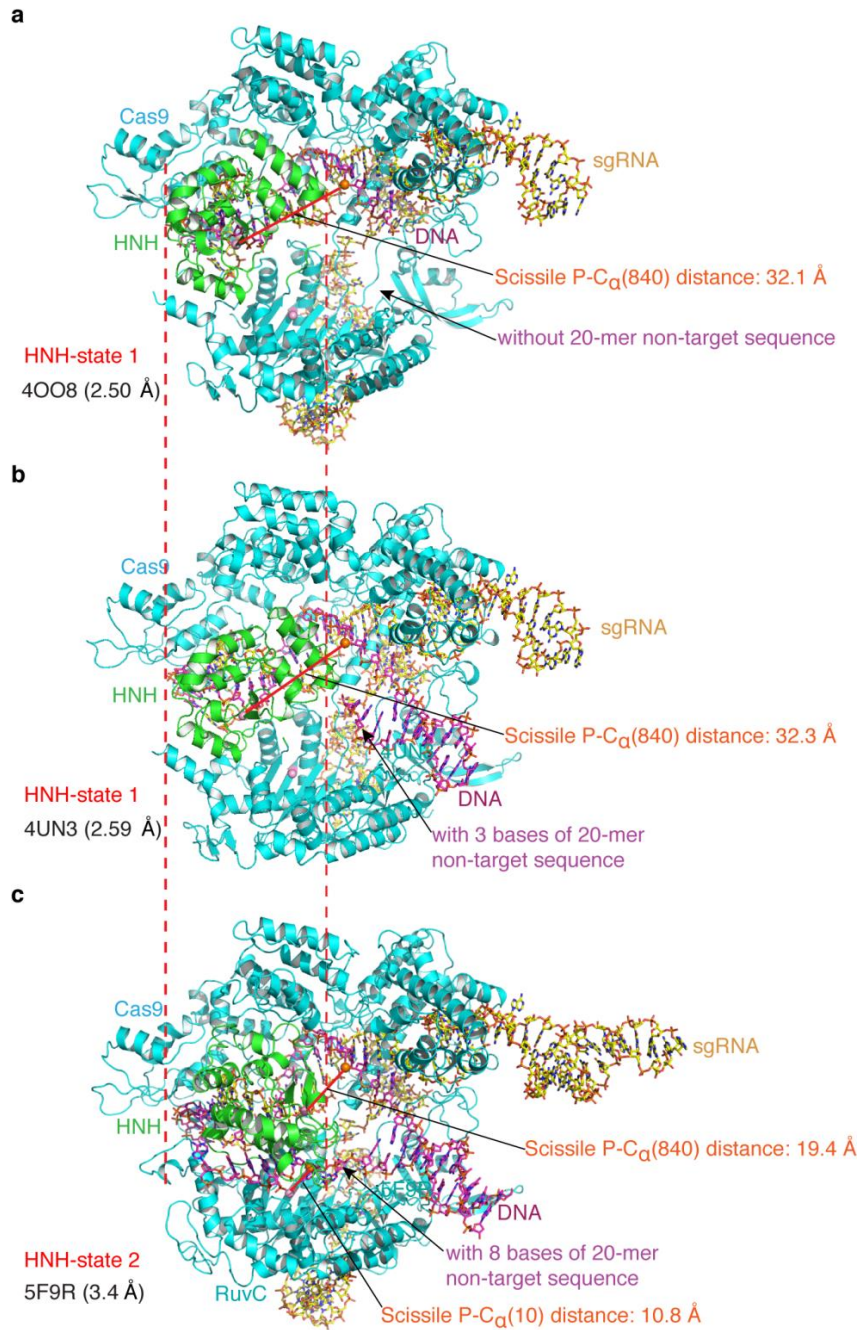

**Supplementary Figure 1 | Two distinct conformational states of the HNH domain in crystal structures.** **a** HNH-state 1 in PDB 4OO8, in which the distance from the C $\alpha$  atom of the HNH catalytic residue 840 to the attacked phosphorus (scissile P) of the target strand is 32.1 Å. The dashed lines indicate the boundary of the HNH domain. **b** HNH-state 1 in PDB 4UN3, in which the distance from HNH-C $\alpha$ (840) to its scissile P is 32.3 Å. **c** HNH-state 2 in PDB 5F9R, in which the distance from HNH-C $\alpha$ (840) to its scissile P is 19.4 Å, and that from RuvC-C $\alpha$ (10) to its scissile P of the non-target strand is 10.8 Å.

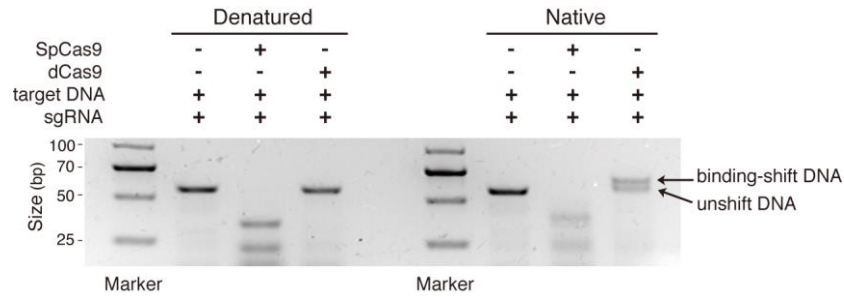

**Supplementary Figure 2 | Detection of the formation of the SpCas9-sgRNA-DNA ternary complex by agarose gel electrophoresis.** To ensure the ternary complex formation, a concentration ratio of 1:1.2:1.5 was used for SpCas9/dCas9(D10A, H840A), sgRNA and target DNA in the mixture. The electrophoresis was carried out after the mixture was cultured and dispersed overnight. Denatured: the mixture solution was heated at 70 °C for 10 min before electrophoresis to inactivate and disassociate the complexes. Native: electrophoresis without denaturation. In the last lane, the ‘binding-shift’ band indicates the target DNAs bound to SpCas9-sgRNA; and the ‘unshift’ band corresponds the remaining DNAs. Data are shown for one representative experiment from three independent experiments with similar results.

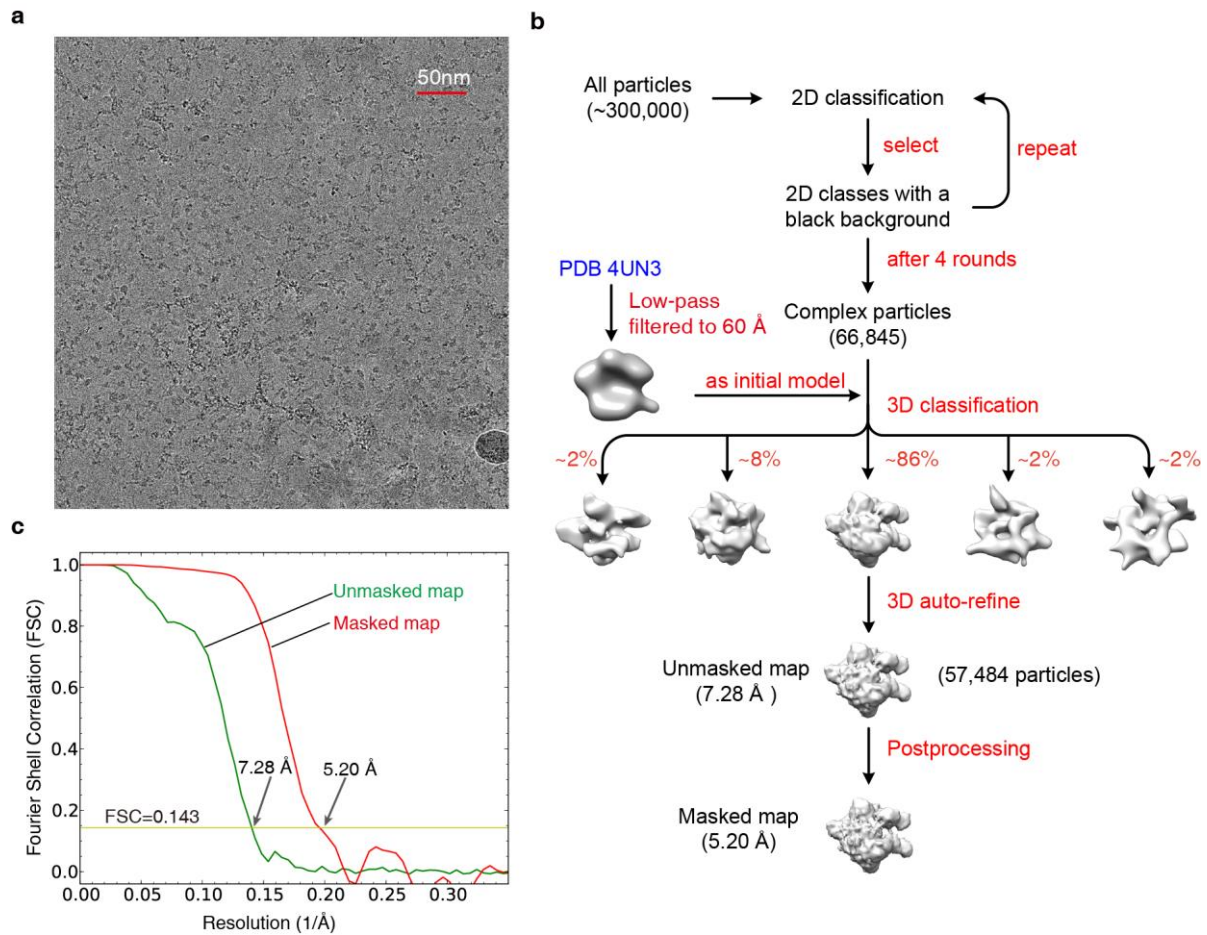

**Supplementary Figure 3 | Single-particle cryo-EM study of the SpCas9-sgRNA-DNA ternary complex.** **a** A typical raw micrograph of the ternary complex in the vitreous ice (scale bar, 50 nm). All cryo-EM images were collected on a Titan microscope using a K2 Summit direct detection device camera. **b** Flowchart for the single-particle 3D reconstruction with RELION. **c** FSC curves for the EM density maps between two independently refined halves, before and after post-processing in RELION.

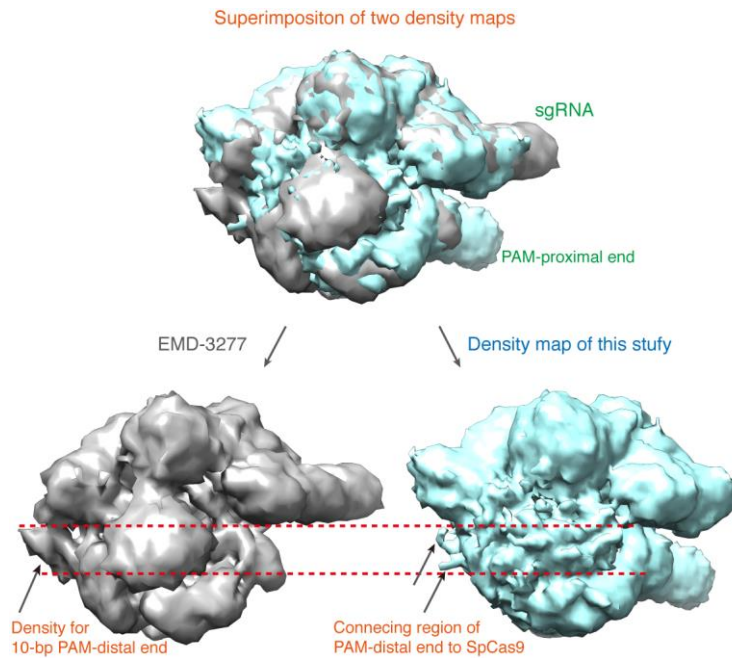

**Supplementary Figure 4 | Superimposition of cryo-EM density maps of the ternary complex.**

The superimposition of our EM density map on (contoured at  $\sim 1.0\sigma$ ) a recent EM structure with a 40-bp target DNA (EMD-3277, contoured at  $\sim 1.7\sigma$ ) reveals relatively small density regions that may correspond to the connecting region of the PAM-distal end to SpCas9.

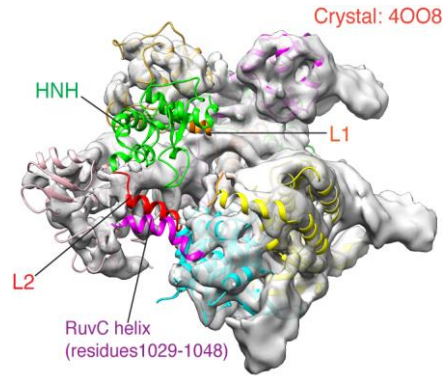

**Supplementary Figure 5 | Rigid-body fitting of the crystal structure 4008 with the HNH domain.** The correlation coefficient of the rigid-body fitting is  $\sim 0.80$ . The density map is shown at the contour level of  $\sim 4.0\sigma$ . Except for the helices in HNH, L1 and L2, and one in RuvC (residues 1029-1048), other helices in 4008 could be well resolved, as shown in Fig. 1c.

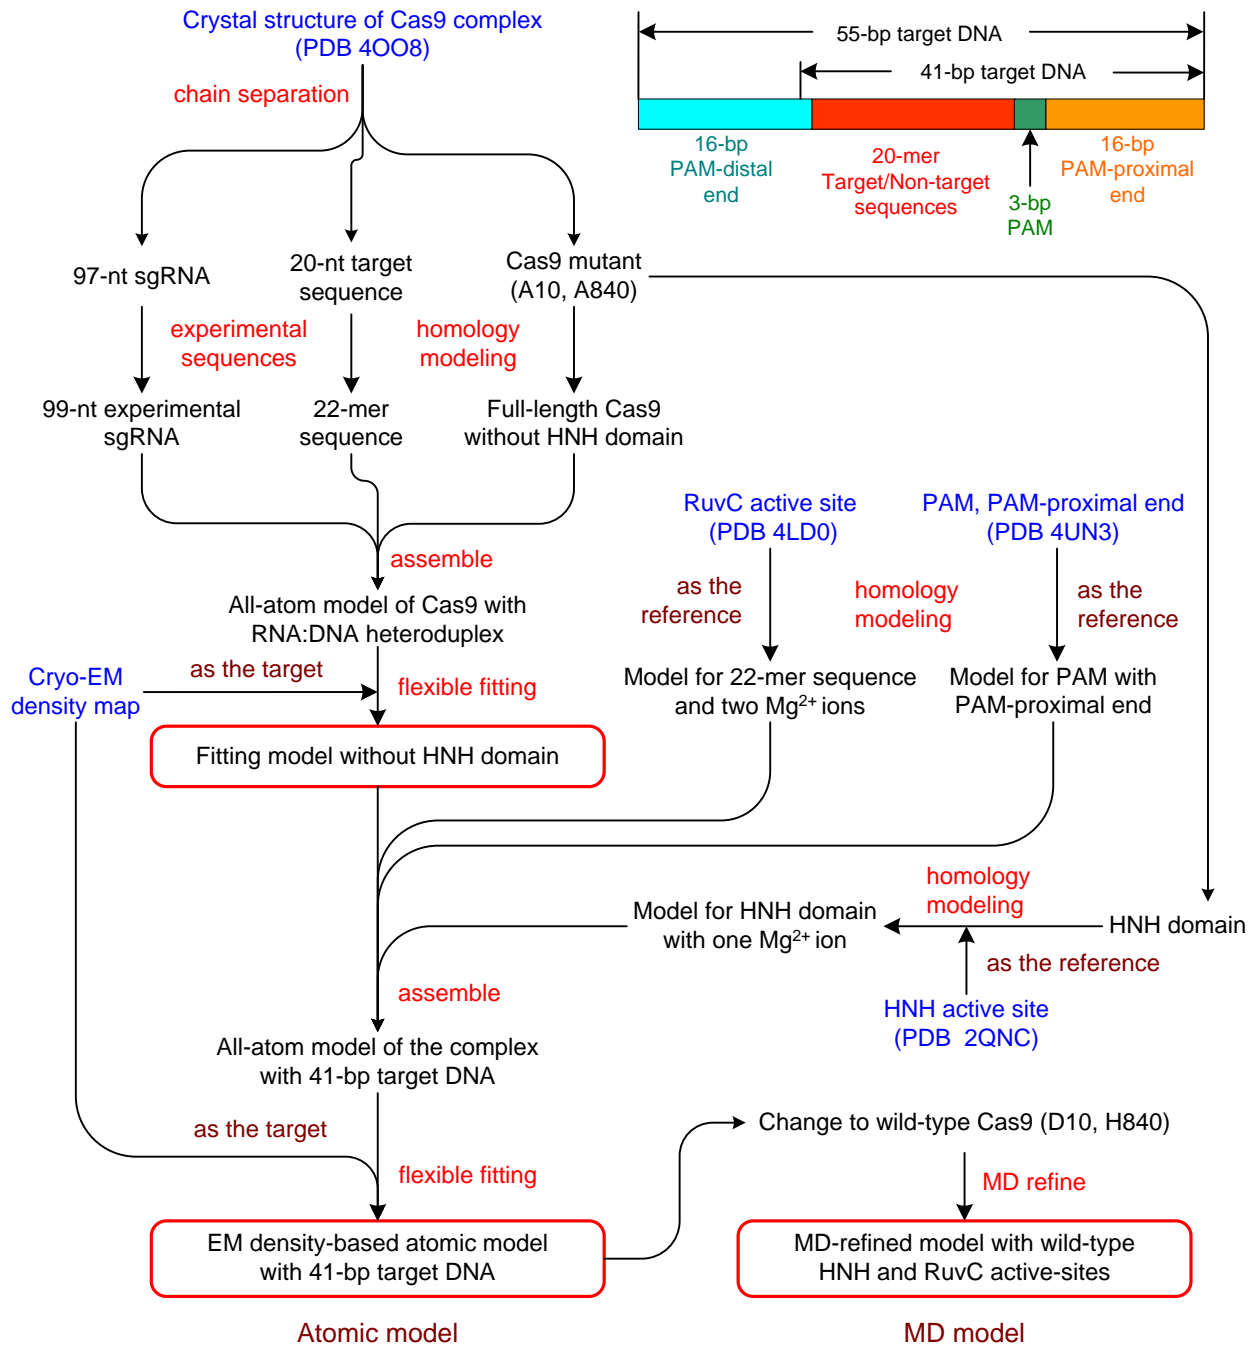

**Supplementary Figure 6 | Flowchart for the building and refinement of atomic models.** The atomic model for the ternary complex possesses the experimental SpCas9 mutant (D10A, H840A) and 41 base pairs of the 55-bp target DNA (41-bp target DNA). The MD model for the ternary complex with the wild-type SpCas9 was constructed with the EM-based atomic model, and then refined by large-scale MD simulations with explicit water solvent.

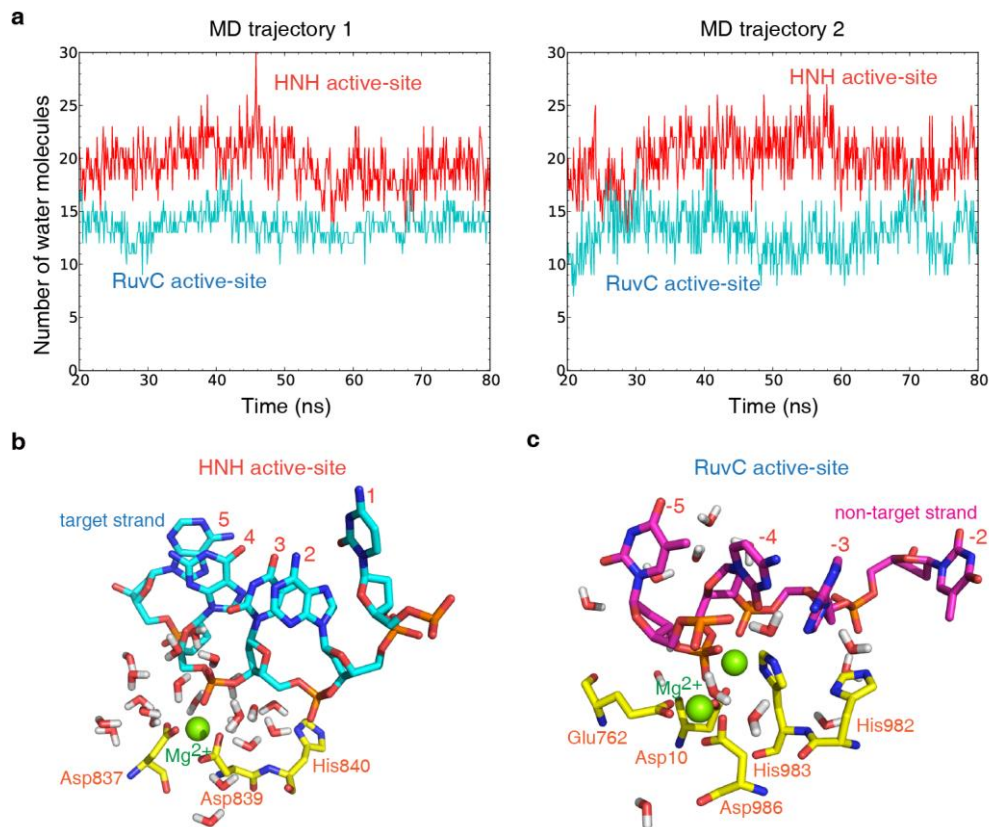

**Supplementary Figure 7 | MD simulations of the ternary complex with explicit solvent. a** Time-dependent number of water molecules in the wild-type HNH and RuvC active-sites in two independent MD simulations of 80 nanoseconds (ns). **b, c** Snapshots of water molecules in the HNH active-site (21 molecules within 7 Å around  $Mg^{2+}$ ) and the RuvC active-site (14 molecules within 10 Å around two  $Mg^{2+}$  ions) at 50 ns from MD trajectory 2.

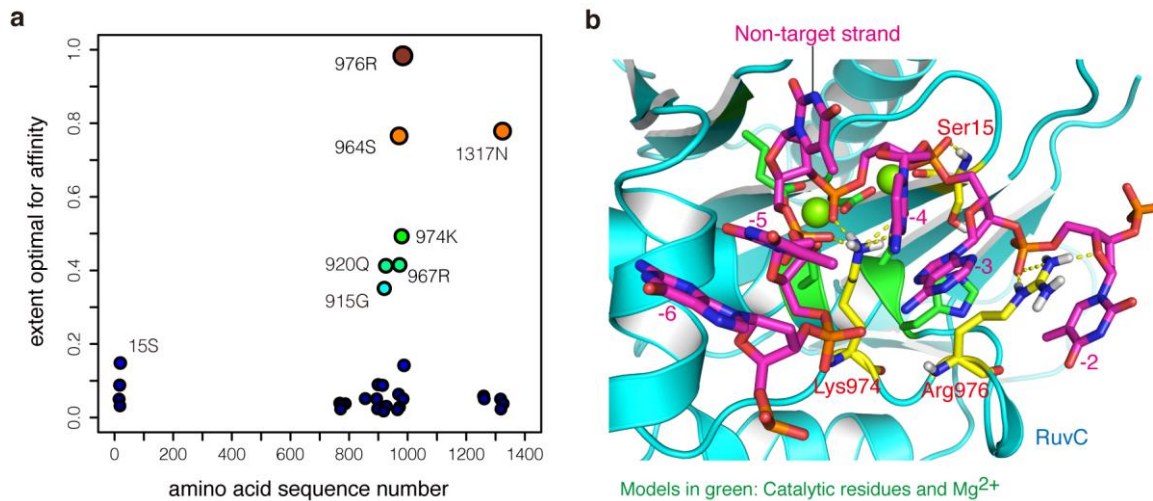

**Supplementary Figure 8 | Key RuvC residues for the binding to the non-target strand. a** Structure-based prediction of key residues using the MD-refined atomic model and the Rosetta program. The radius of each circle is proportional to the computational affinity score of the corresponding residue to the non-target DNA strand. **b** Hydrogen bonding of three key RuvC residues (in yellow) with the non-target strand in the MD model.



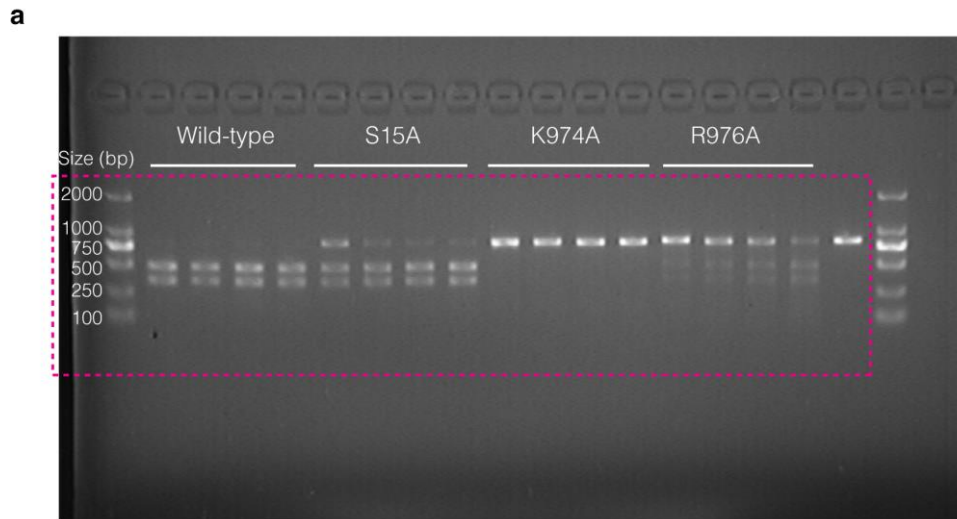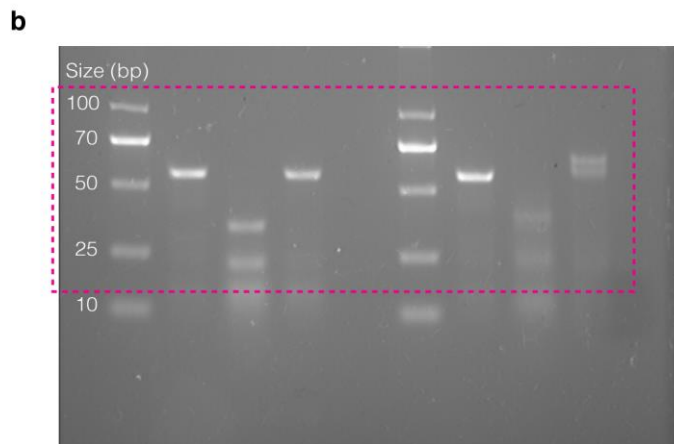

**Supplementary Figure 9 | The uncropped images of agarose gel electrophoresis. a** The uncropped image corresponding to Fig. 5c. The magenta box shows the region presented in the figure. **b** The uncropped image corresponding to Supplementary Fig. 2. The magenta box shows the region presented in the figure.

**Supplementary Table 1 | Parameters of cryo-EM data collection and 3D reconstruction**

| <b>Data collection</b>                                |              |
|-------------------------------------------------------|--------------|
| Micrographs                                           | 592          |
| Voltage (kV)                                          | 300          |
| Pixel size (Å)                                        | 1.3          |
| Total electron dose (e <sup>-</sup> Å <sup>-2</sup> ) | 45           |
| Exposure time (s)                                     | 7.6          |
| Nominal magnification                                 | 18000×       |
| Defocus range (μm)                                    | -1.3 to -3.5 |
| <b>3D reconstruction</b>                              |              |
| Final particles                                       | 57484        |
| Resolution (Å)                                        | 5.20         |
| Accuracy of rotation (degree)                         | 5.12         |
| Accuracy of translation (pixel)                       | 1.83         |
| B-factor (Å <sup>2</sup> )                            | -80.0        |

**Supplementary Table 2 | Primer sequences used in this study**

| <b>Primer names</b>                                  | <b>Sequences (5' → 3')</b>                                                 |
|------------------------------------------------------|----------------------------------------------------------------------------|
| <i>Amplification of SpCas9 coding sequence</i>       |                                                                            |
| Cas9-Half1F                                          | CGCGCGGCAGCCATATGGAAAATCTCTACTTCCAAGGCG                                    |
| Cas9-Half1R                                          | CAGTTTTCTTGACAGCCGCC                                                       |
| Cas9-Half2F                                          | GGCGGCTGTCAAGAAAAC TG                                                      |
| Cas9-Half2R                                          | TGGTGGTGGTGCTCGAGTCAGTCTCCACCGAGC                                          |
| <i>Construction of the dCas9 mutant(D10A, H840A)</i> |                                                                            |
| dCas-upF                                             | GGAATTGTGAGCGGATAACAATTCC                                                  |
| dCas-10F                                             | ATTGGGCTCGCTATCGGCACAAACAGCG                                               |
| dCas-10R                                             | CGCTGTTTTGTGCCGATAGCGAGCCCAAT                                              |
| dCas-840F                                            | GACTACGACGTGGATGCTATCGTGCCCCAGT                                            |
| dCas-840R                                            | ACTGGGGCACGATAGCATCCACGTCGTAGTC                                            |
| <i>Construction of other SpCas9 mutants</i>          |                                                                            |
| cas9 mut upF                                         | GCGAAATTAATACGACTCAC TATAGG                                                |
| cas9 mut upR                                         | CCGGGATTTGGACAGCC                                                          |
| 15R                                                  | GCCGACGGCGTTTTGTGCCGATATCG                                                 |
| 15F                                                  | ACAAACGCCGTCGGCTGGGC CGT                                                   |
| cas9 mut downF                                       | GGCGGCTGTCAAGAAAAC TG                                                      |
| cas9 mut downR                                       | TTAGCGTCGGCGAGGATC                                                         |
| 974F                                                 | TTTATGCGGTGAGAGAGATCAACAATTACC                                             |
| 974R                                                 | CTCTCTCACCGCATAAAACTGAAAGTCCT                                              |
| 976F                                                 | TAAGGTGGCAGAGATCAACAATTACCACC                                              |
| 976R                                                 | GATCTCTGCCACCTTATAAAACTGAAAGTCC                                            |
| <i>sgRNA in vitro transcription</i>                  |                                                                            |
| gRNA-F                                               | TAATACGACTCACTATAGGTACCGCTCCAGTCGTTTCATGGTTTTAGAGCT<br>AGAAATAGCAAGTTAAAAT |
| gRNA-R                                               | AGCACCGACTCGGTGCCACT                                                       |
| <i>DNA cleavage</i>                                  |                                                                            |
| Invitro Cut F (Fam)                                  | CTGTGAAGTCAACTTGTC AATCC                                                   |
| Invitro Cut R (Rox)                                  | CCCTCCATGTACAGCTCTTCAT                                                     |
